# Supplementary material
Source: PubMed Central journal article supplement (PMC3830948)
Supplement: NIHMS507033-supplement-Supplementary_Data.pdf [file NIHMS507033-supplement-Supplementary_Data.pdf]

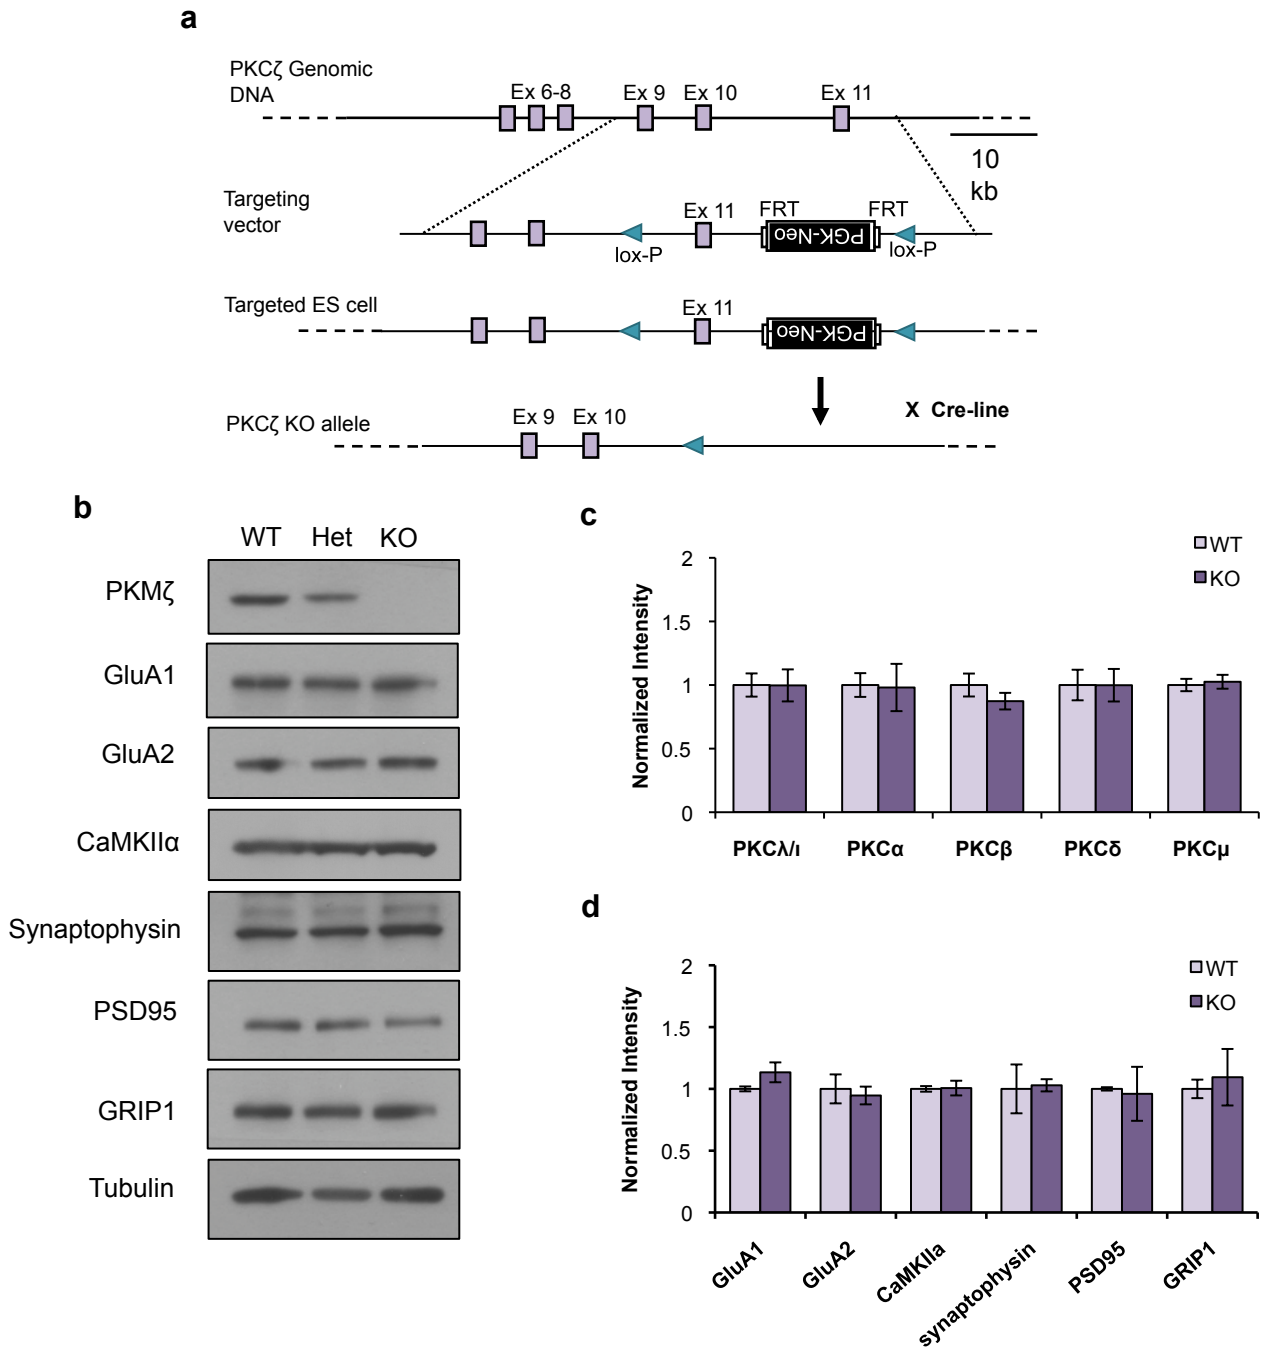

**Figure S1: Characterization of PKC/Mζ KO mice.** **a**, Schematic for PKC/Mζ KO targeting strategy in which exon 11 is floxed and deleted by Cre recombinase to create a frameshift mutation in *Prkcζ*. **b**, Western blots of synaptic proteins from whole brain lysate in wild-type, heterozygous and homozygous PKC/Mζ mice. **c,d**, Quantification of western blots shown in Fig. 1c and Fig. S1, respectively (n = 6-9). Values are normalized to tubulin as a loading control and then to WT values and represent mean ± s.e.m.

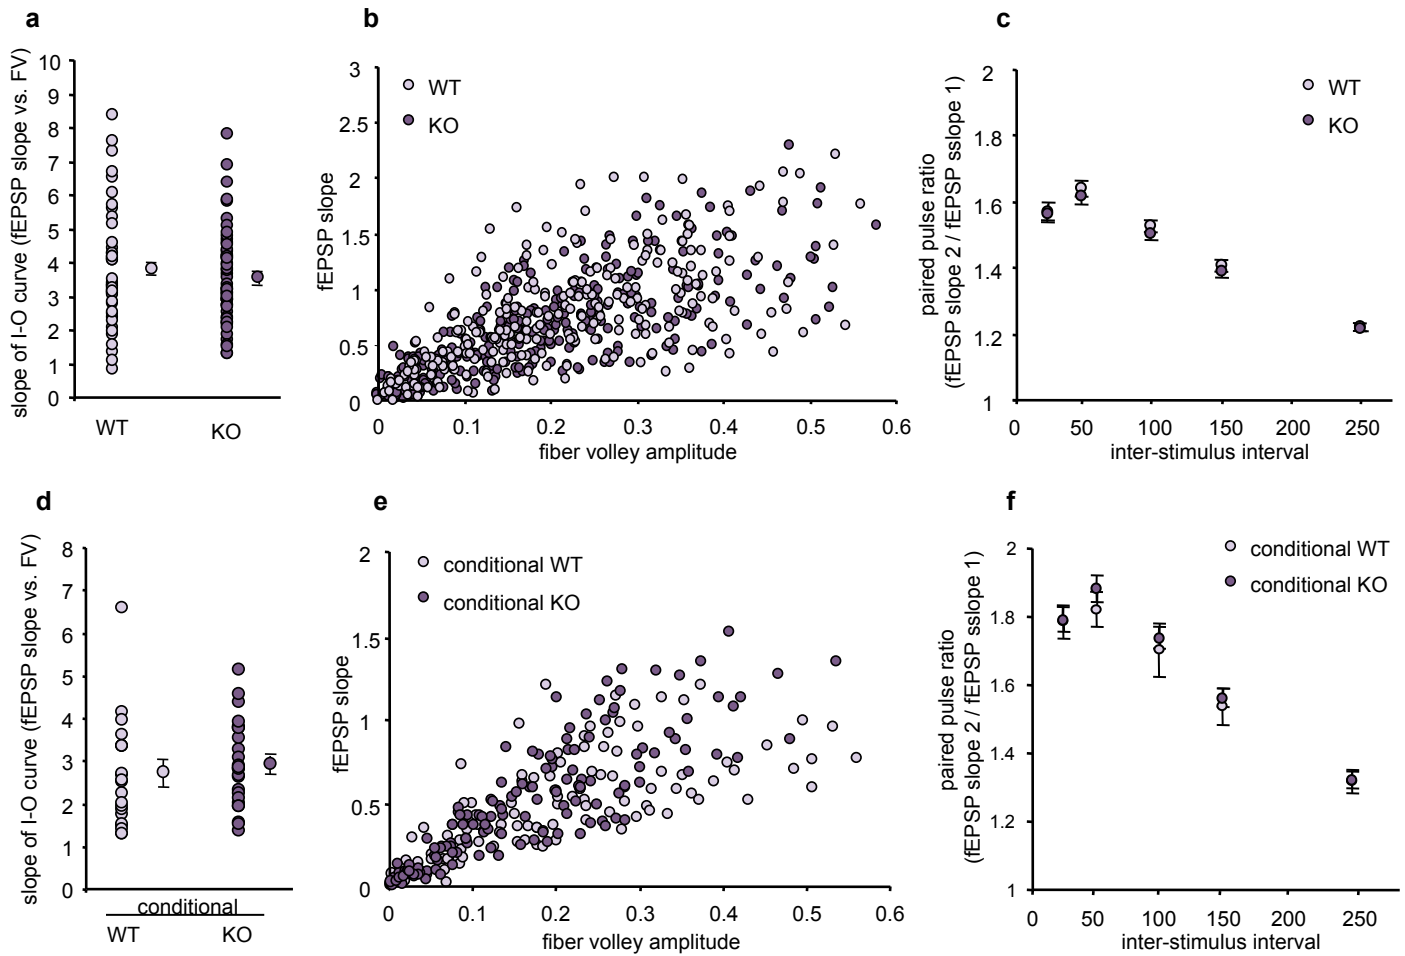

**Figure S2: Basal synaptic transmission is unaffected in conventional and conditional PKC/M $\zeta$  KO mice.** **a**, The slope of the input output curve is not altered in conventional PKC/M $\zeta$  KO mice. WT, n=45,  $3.794 \pm 0.13$  ms<sup>-1</sup>; KO, n=54,  $3.54 \pm 0.19$  ms<sup>-1</sup>;  $p > 0.4$ . **b**, Raw data from all input-output curves shown in **a**. **c**, Paired pulse facilitation is not altered in conventional PKC/M $\zeta$  KO mice. WT, n = 56, KO, n = 57. **d**, The slope of the input output curve is not altered in conditional PKC/M $\zeta$  KO mice. WT, n=21,  $2.73 \pm 0.31$  ms<sup>-1</sup>; KO, n=25,  $2.92 \pm 0.2$  ms<sup>-1</sup>;  $p > 0.4$ . **e**, Raw data from all input-output curves shown in **d**. **f**, Paired pulse facilitation is not altered in conditional PKC/M $\zeta$  KO mice. WT, n = 28, KO, n = 30. In all figures error bars represent  $\pm$  s.e.m.

Volk, Supplementary Figure 3

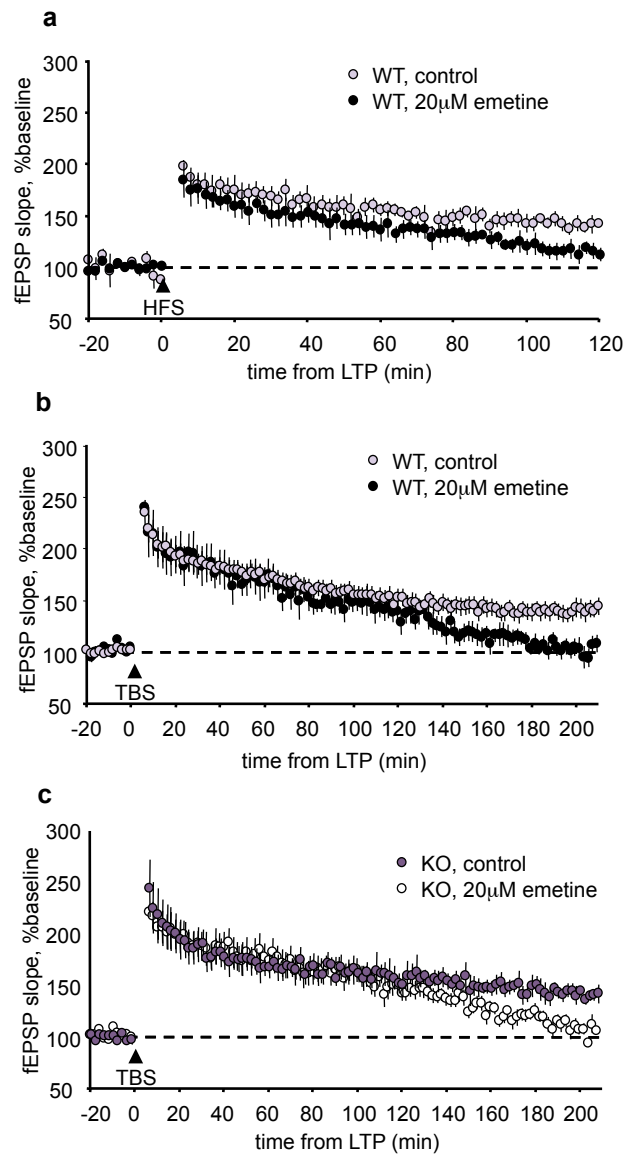

**Figure S3: Protein synthesis-dependence of LTP in WT and PKC/M $\zeta$  KO mice. a,** HFS LTP in WT mice is sensitive to protein synthesis inhibition by  $\sim 2$  hours (at 120min. control,  $n=5$ ,  $140 \pm 6\%$ ;  $20\mu\text{M}$  emetine,  $n=6$ ,  $115 \pm 7\%$ ;  $p < 0.05$ ). **b,** TBS LTP in WT mice is sensitive to protein synthesis inhibition by  $\sim 3$  hours (at 180min, control,  $n=9$ ,  $139 \pm 8\%$ ;  $20\mu\text{M}$  emetine,  $n=7$ ,  $109 \pm 8\%$ ;  $p < 0.05$ ). **c,** TBS LTP in PKC/M $\zeta$  KO mice is also sensitive to protein synthesis inhibition by  $\sim 3$  hours (at 180min, control,  $n=6$ ,  $144 \pm 7\%$ ;  $20\mu\text{M}$  emetine,  $n=9$ ,  $119 \pm 8\%$ ;  $p < 0.05$ ). When used, emetine was present throughout the experiment.

Volk, Supplementary Figure 4

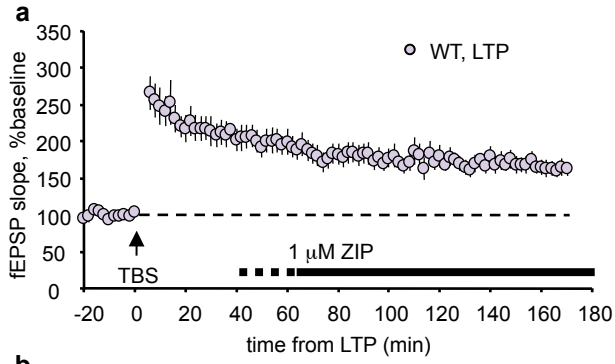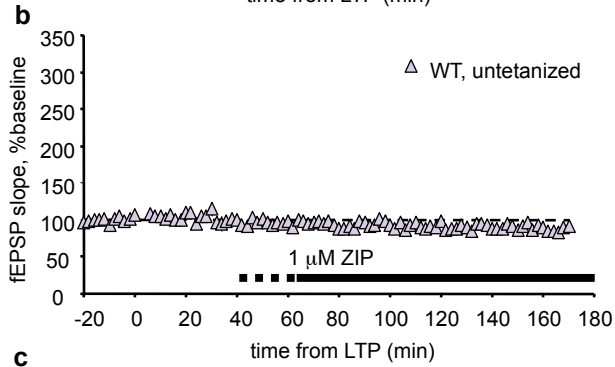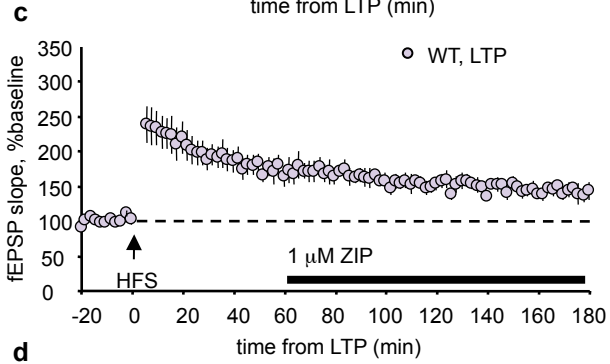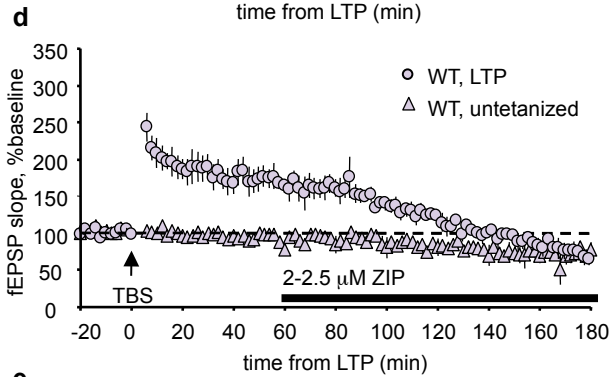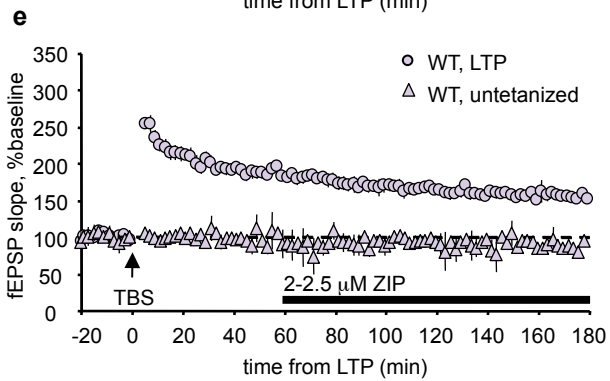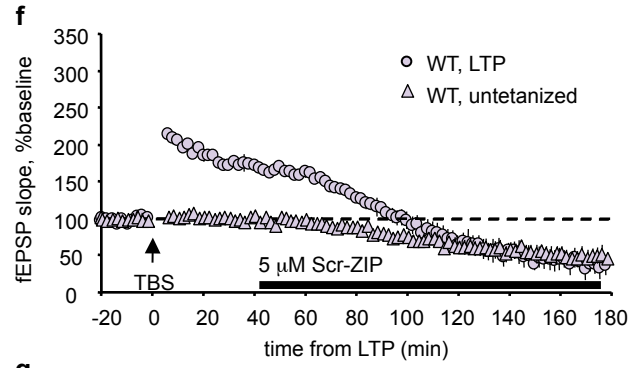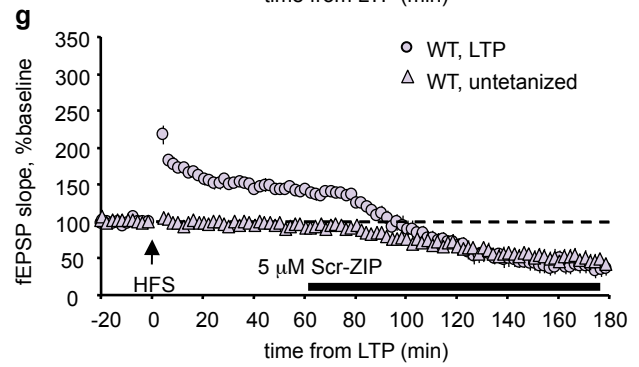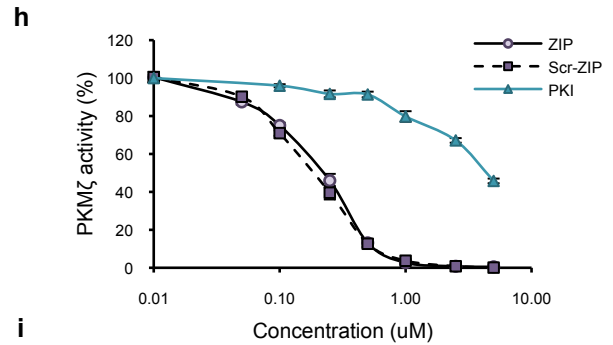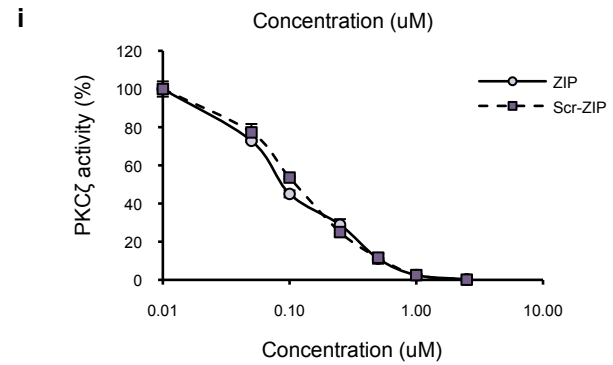

**Figure S4: 5  $\mu$ M ZIP is the minimum effective concentration for reversing LTP, but the 5  $\mu$ M Scr-ZIP also reverses LTP.** **a**, 1  $\mu$ M ZIP has no effect on TBS LTP in WT mice, n=6. ZIP was applied 40 or 60 min after TBS with the same result, so these data are combined. **b**, 1  $\mu$ M ZIP has no effect on basal synaptic transmission, n=6. ZIP was applied to untetanized slices 40 or 60 min after LTP was induced in the paired slice. **c**, 1  $\mu$ M ZIP has no effect on HFS LTP, n=5. **d,e**, 2-2.5  $\mu$ M ZIP is close to the threshold for effective concentration in reversing LTP. 2-2.5  $\mu$ M ZIP reduced tetanized and basal synaptic transmission in half of our experiments (d, tetanized, n=4; untetanized, n=2) and had no effect in half of our experiments (e, tetanized, n=4; untetanized, n=2). **f,g**, 5  $\mu$ M myr-scrambled-ZIP ('control' peptide) reverses TBS and HFS LTP in addition to reducing basal transmission (f, TBS LTP, n=5; untetanized, n=7; g: HFS LTP, n=8; untetanized =7). **h,i** ZIP and Scr-ZIP are equally effective at inhibiting PKM $\zeta$  (h) and PKC $\zeta$  (i) biochemically *in vitro* (each point, n=6). Data represent mean  $\pm$  s.e.m.

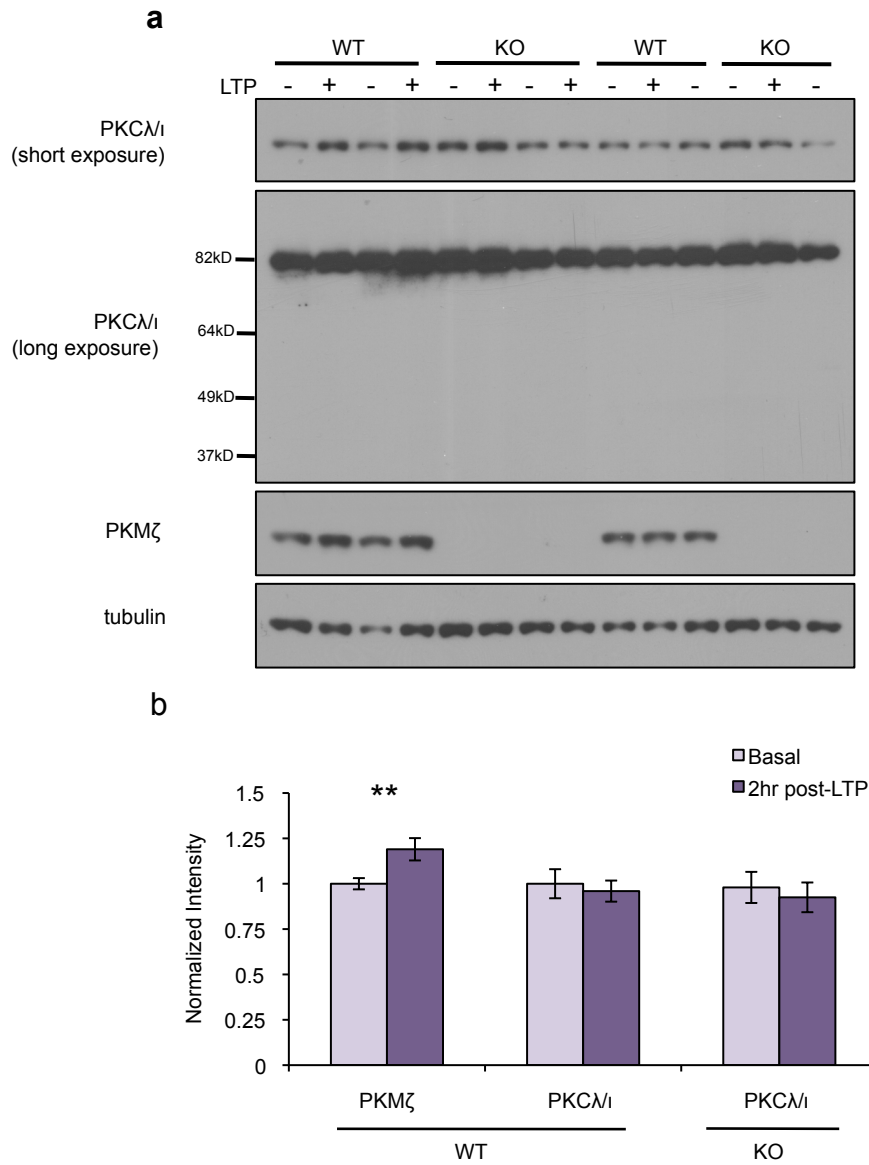

**Figure S5: LTP in PKC/M $\zeta$  KO is not compensated by elevated or truncated PKC $\lambda$ / $\iota$  products.** **a**, Western blot analysis of microdissected CA1 regions 2hr after either basal stimulation (LTP -) or TBS (LTP +) in WT and PKC/M $\zeta$  KO mice. **b**, Quantification of PKM $\zeta$  and PKC $\lambda$ / $\iota$  expression (PKM $\zeta$ : WT, basal n=14, 1.0 ± 0.03, LTP n=13, 1.19 ± 0.06, \* p < 0.01 Student's *t*-test; PKC $\lambda$ / $\iota$ : WT, basal n=12, 1.0 ± 0.08 LTP, n=12, 0.96 ± 0.06, p > 0.6; KO, basal n=12, 0.98 ± 0.09, LTP n=12, 0.93 ± 0.08, p > 0.6). Values are normalized to tubulin as a loading control and then to WT basal values and represent mean ± s.e.m.

Volk, Supplementary Figure 6

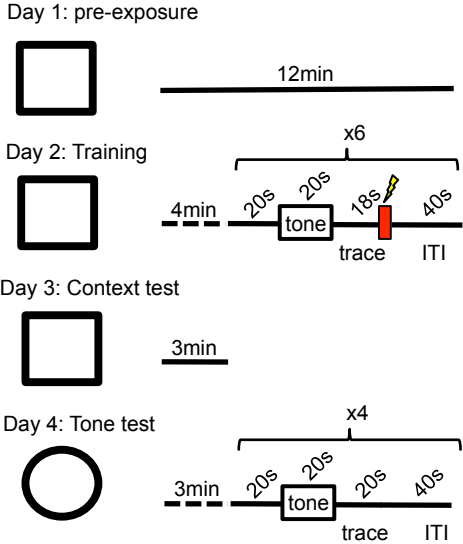

**Figure S6: Trace fear conditioning protocol.** Trace fear conditioning was conducted over the course of four days as shown.
